# Supplementary material for: GFsa Index for Adjustment of the Researchers’ Productivity/Ranking, considering the Two Most Relevant Variables Neglected: Total Number of Citations and “Scientific Age” – a Proof of Concept with the Assessment of 1,020 Highly-Cited Researchers in De
Source: Preprints.org preprint supplement (doi:10.20944/preprints202404.0453.v1), 2024-04-08
Supplement: Supplementary file 1 [file supplementary]

**Suppl. Table 1**. GFsa ranking for the highest cited researchers in Dentistry, following the H-index ranking.

| **GFsa index ranking** | **Author** | **H-index** | **H-index ranking** | **GFsa index** |
| --- | --- | --- | --- | --- |
| 1 | Georgios Kotsakis | 38 | 583 | 154.828402 |
| 2 | Qian Wang | 123 | 4 | 109.997622 |
| 3 | Marta Revilla León | 38 | 583 | 102.387755 |
| 4 | Alberto Monje | 57 | 178 | 78.5763889 |
| 5 | Ratilal Lalloo | 57 | 178 | 72.8310658 |
| 6 | Yu-Kang Tu | 65 | 118 | 65.2928 |
| 7 | Maha El Tantawi | 43 | 432 | 63.3767313 |
| 8 | Van Meerbeek Bart | 134 | 1 | 60.5198962 |
| 9 | Andy Wai Kan Yeung | 37 | 618 | 60.0082645 |
| 10 | Richard J Miron | 59 | 161 | 57.0488889 |
| 11 | Songtao Shi | 112 | 10 | 56.0138776 |
| 12 | Takeshi Noda | 65 | 118 | 55.3671875 |
| 13 | Giuseppe Troiano | 41 | 488 | 54.7933884 |
| 14 | José F. Siqueira Jr. | 117 | 7 | 54.0249703 |
| 15 | Bogna Stawarczyk | 67 | 101 | 52.7301038 |
| 16 | Jürgen Groll | 69 | 89 | 51.5575 |
| 17 | Mutlu Özcan | 96 | 23 | 49.0919067 |
| 18 | Yu Leo Lei | 37 | 618 | 47.5804989 |
| 19 | Mohammad Atai | 39 | 555 | 47.4545455 |
| 20 | Solmaz Maleki Dizaj | 45 | 389 | 46.8106509 |
| 21 | Nawshad Muhammad | 53 | 236 | 46.2653061 |
| 22 | Biao Ren | 43 | 432 | 43.8977778 |
| 23 | Frank Witte | 43 | 432 | 43.705104 |
| 24 | Yin Xiao | 86 | 40 | 42.5701531 |
| 25 | Andrew I Su | 68 | 97 | 42.3264 |
| 26 | Isabela N Rôças | 91 | 33 | 42.112 |
| 27 | İrena Sailer | 61 | 142 | 41.7777778 |
| 28 | Muhammad Sohail Zafar | 56 | 196 | 41.7093426 |
| 29 | Gabriel Kalil Rocha Pereira | 36 | 669 | 40.93 |
| 30 | Gaetano Isola | 54 | 227 | 40.5039063 |
| 31 | Wenjie Zhang 张文杰 | 44 | 409 | 40.2307692 |
| 32 | Spyridon N Papageorgiou | 49 | 314 | 40.0828402 |
| 33 | Shariq Najeeb | 32 | 868 | 39.9305556 |
| 34 | Donald Nixdorf | 33 | 809 | 39.6280992 |
| 35 | Pekka Vallittu | 106 | 16 | 39.1337891 |
| 36 | Anton Sculean | 102 | 19 | 39.0489074 |
| 37 | Hom Lay Wang | 132 | 2 | 37.9315883 |
| 38 | David Herrera | 74 | 70 | 37.7115385 |
| 39 | Buser Daniel | 127 | 3 | 36.9540816 |
| 40 | ML Mei | 41 | 488 | 36.2959184 |
| 41 | Guo-Hao (Alex) Lin | 36 | 669 | 35.8016529 |
| 42 | Hee Moon Kyung | 39 | 555 | 34.1377778 |
| 43 | Fernando Suárez López Del Amo | 43 | 432 | 33.5277778 |
| 44 | Zohaib Khurshid | 53 | 236 | 32.1440443 |
| 45 | Ronald Jung | 81 | 53 | 32.0612245 |
| 46 | Lussi Adrian | 109 | 12 | 31.5533241 |
| 47 | Thomas Dietrich | 69 | 89 | 31.2549428 |
| 48 | Felipe Gonçalves Belladonna | 40 | 519 | 31.2083333 |
| 49 | Lobat Tayebi | 66 | 110 | 31.0272109 |
| 50 | William Giannobile | 104 | 18 | 30.9247405 |
| 51 | Hsun Liang Chan | 46 | 366 | 29.7688889 |
| 52 | Rafael R Moraes | 54 | 227 | 29.3573407 |
| 53 | Cecilia Goracci | 72 | 80 | 29.3008 |
| 54 | Anibal Diogenes | 49 | 314 | 28.8060942 |
| 55 | Prasanna Neelakantan | 44 | 409 | 28.5674741 |
| 56 | Lippo Lassila | 83 | 46 | 28.192602 |
| 57 | Stefan Priebe | 111 | 11 | 27.931875 |
| 58 | Joo Cheol Park | 39 | 555 | 27.0887574 |
| 59 | Panos N Papapanou | 85 | 42 | 26.6820988 |
| 60 | Elena Figuero Ruiz | 48 | 332 | 26.6326531 |
| 61 | Mona Nasser | 41 | 488 | 26.631579 |
| 62 | Marco Cicciu | 61 | 142 | 26.3900227 |
| 63 | Patrick Schmidlin | 66 | 110 | 26.3667297 |
| 64 | Martin Schimmel Mas | 46 | 366 | 26.2802768 |
| 65 | Daniela Prócida Raggio | 46 | 366 | 26.1018519 |
| 66 | Ammar Hassanzadeh Keshteli | 46 | 366 | 26.058642 |
| 67 | Caio Ferraz | 67 | 101 | 26.0177515 |
| 68 | Marco Versiani | 58 | 165 | 25.9525 |
| 69 | Gargi Sarode | 32 | 868 | 25.8816568 |
| 70 | Cristiano Tomasi | 43 | 432 | 25.7324263 |
| 71 | Elena M Varoni | 37 | 618 | 25.6297578 |
| 72 | Chen Yeng | 37 | 618 | 25.4765625 |
| 73 | Bruno Chrcanovic | 62 | 134 | 25.4489796 |
| 74 | Antonio Scarano | 72 | 80 | 25.3288889 |
| 75 | Panos Papaspyridakos | 38 | 583 | 25.3125 |
| 76 | Hercílio Martelli Júnior | 44 | 409 | 25.0484429 |
| 77 | Nagihan Bostanci | 48 | 332 | 24.8919753 |
| 78 | Helen Victoria Worthington | 114 | 9 | 24.7348771 |
| 79 | Gustavo De-Deus | 71 | 84 | 24.576 |
| 80 | Valentim Barao | 51 | 276 | 24.2993827 |
| 81 | Praveen Arany | 38 | 583 | 24.2382272 |
| 82 | Junji Tagami | 100 | 22 | 24.2016657 |
| 83 | Magda Feres | 68 | 97 | 24.0534979 |
| 84 | Rafael Sarkis-Onofre | 30 | 973 | 23.9349112 |
| 85 | Robert H Dworkin | 105 | 17 | 23.9064 |
| 86 | Iain L Chapple | 74 | 70 | 23.8653061 |
| 87 | Sachin Chakradhar Sarode | 35 | 707 | 23.4755556 |
| 88 | Steven Offenbacher | 119 | 5 | 23.4431487 |
| 89 | Mahmoud Torabinejad | 95 | 25 | 23.3331758 |
| 90 | Kimon Divaris | 50 | 293 | 23.2797784 |
| 91 | Cláudio Mendes Pannuti | 44 | 409 | 23.2768166 |
| 92 | Jan Cosyn | 52 | 253 | 23.1972789 |
| 93 | Yiu Yan Mike Leung | 31 | 917 | 23.0902778 |
| 94 | Flaviana Bombarda De Andrade | 34 | 755 | 22.5138889 |
| 95 | Ignacio Sanz Martin | 31 | 917 | 22.2083333 |
| 96 | Nasim Chiniforush | 39 | 555 | 22 |
| 97 | Hakan Arslan | 52 | 253 | 21.9833795 |
| 98 | Hakan Arslan | 52 | 253 | 21.9833795 |
| 98 | Eduardo Fernández Godoy | 38 | 583 | 21.8979592 |
| 100 | Lars Sennerby | 109 | 12 | 21.74625 |
| 101 | Paulo Henrique Braz Silva | 30 | 973 | 21.6977778 |
| 102 | Alireza Moshaverinia | 40 | 519 | 21.5195313 |
| 103 | Ove A Peters | 70 | 85 | 21.4609782 |
| 104 | Ricardo Gariba Silva | 39 | 555 | 21.4567474 |
| 105 | Il Keun Kwon | 64 | 126 | 21.4008876 |
| 106 | Taha Özyürek | 31 | 917 | 21.25 |
| 107 | Marcelo Giannini | 73 | 75 | 21.2066327 |
| 108 | Richard Geddie Watt | 73 | 75 | 21.144169 |
| 109 | Maria Cassia Ferreira De Aguiar | 37 | 618 | 20.8577778 |
| 110 | Tuula Salo | 102 | 19 | 20.8378685 |
| 111 | Atsuo Amano | 69 | 89 | 20.6530471 |
| 112 | Gustavo Avila Ortiz | 45 | 389 | 20.5827664 |
| 113 | Indraneel Bhattacharyya | 38 | 583 | 20.5429688 |
| 114 | Russell S Taichman | 72 | 80 | 20.5406574 |
| 115 | Geert Jmg Van Der Heijden | 75 | 66 | 20.4816327 |
| 116 | Giampietro Farronato | 37 | 618 | 20.2890625 |
| 117 | G Lavigne | 96 | 23 | 20.2647234 |
| 118 | Jukka P Matinlinna | 55 | 211 | 19.9571006 |
| 119 | Masoud Parirokh | 41 | 488 | 19.8854167 |
| 120 | Kenneth M Hargreaves | 92 | 30 | 19.5358025 |
| 121 | Sinhoreti MA | 74 | 70 | 19.2841797 |
| 122 | Georgios N Belibasakis | 57 | 178 | 19.2204861 |
| 123 | Sadeq Ali Al-Maweri | 37 | 618 | 19.1835938 |
| 124 | Maria Jose Hitomi Nagata | 35 | 707 | 19.1530612 |
| 125 | Kee-Joon Lee | 35 | 707 | 19.0311419 |
| 126 | Nurcan Buduneli | 49 | 314 | 18.8975694 |
| 127 | Morenike Oluwatoyin Folayan | 53 | 236 | 18.7121914 |
| 128 | Juliane Maria Guerreiro Tanomaru | 56 | 196 | 18.6408318 |
| 129 | Georgios E Romanos | 84 | 44 | 18.6204082 |
| 130 | Gang Wu | 38 | 583 | 18.5429688 |
| 131 | Gustavo G Nascimento | 43 | 432 | 18.5185185 |
| 132 | Xiaohua Liu | 41 | 488 | 18.4820416 |
| 133 | Karan Gulati | 35 | 707 | 18.3571429 |
| 134 | Christopher D Lynch | 60 | 151 | 18.21875 |
| 135 | Yap Au | 75 | 66 | 18.1914672 |
| 136 | Marco Antonio Bottino | 49 | 314 | 18.1570248 |
| 137 | Sašo Ivanovski | 67 | 101 | 18.156956 |
| 138 | Cléa Adas Saliba Garbin | 48 | 332 | 18.0920139 |
| 139 | Momen A Atieh | 34 | 755 | 18 |
| 140 | Colman Mcgrath | 76 | 61 | 17.8411387 |
| 141 | Ricardo Santiago Gomez | 60 | 151 | 17.7530864 |
| 142 | Tim Joda | 39 | 555 | 17.7423823 |
| 143 | İgnace Naert | 93 | 29 | 17.7205786 |
| 144 | Paul H Krebsbach | 83 | 46 | 17.6289262 |
| 145 | Yu Zhang | 61 | 142 | 17.5395408 |
| 146 | Francisco Humberto Nociti Jr | 68 | 97 | 17.526749 |
| 147 | Luca Fiorillo | 46 | 366 | 17.432526 |
| 148 | Irlan Almeida Freires | 31 | 917 | 17.4222222 |
| 149 | Nicola Cirillo | 38 | 583 | 17.3598616 |
| 150 | Veerasathpurush Allareddy | 45 | 389 | 17.355 |
| 151 | Phoebus Madianos | 52 | 253 | 17.3377778 |
| 152 | Hamid Jafarzadeh | 36 | 669 | 17.2191358 |
| 153 | Luca Testarelli | 46 | 366 | 17.147448 |
| 154 | Walter L Siqueira | 50 | 293 | 17.0330579 |
| 155 | Essam A Al-Moraissi | 33 | 809 | 16.9940828 |
| 156 | Thiago De Santana Santos | 52 | 253 | 16.8696845 |
| 157 | Lorenzo Lo Muzio | 76 | 61 | 16.8559557 |
| 158 | Jonathan Broadbent | 46 | 366 | 16.8185255 |
| 159 | Bartold P Mark | 92 | 30 | 16.8083951 |
| 160 | Mauricio Guimaraes Araujo | 50 | 293 | 16.6773356 |
| 161 | Arash Khojasteh | 44 | 409 | 16.6675 |
| 162 | Ricardo D Coletta | 67 | 101 | 16.5229592 |
| 163 | Omar Kujan | 33 | 809 | 16.5069252 |
| 164 | Theodore Eliades | 74 | 70 | 16.4573003 |
| 165 | Massimo Del Fabbro | 82 | 50 | 16.3094136 |
| 166 | Alexandre Augusto Zaia | 66 | 110 | 16.3090531 |
| 167 | Kevin Moss | 49 | 314 | 16.2881944 |
| 168 | Shaymaa Elsaka | 32 | 868 | 16.2044444 |
| 169 | Alessandra Reis | 94 | 28 | 16.1592971 |
| 170 | Maria Letícia Ramos-Jorge | 59 | 161 | 16.1472 |
| 171 | Marlise Inêz Klein | 39 | 555 | 16.1315193 |
| 172 | Takayuki Tsukuba | 34 | 755 | 16.0566406 |
| 173 | Roland Frankenberger | 75 | 66 | 16.0361328 |
| 174 | Ricardo Teles | 53 | 236 | 15.9961735 |
| 175 | Yiu Cynthia Ky | 68 | 97 | 15.9935721 |
| 176 | Atsushi Mine | 41 | 488 | 15.9872 |
| 177 | Jessica Y Lee | 53 | 236 | 15.8472222 |
| 178 | Martina Stefanini | 32 | 868 | 15.8222222 |
| 179 | Sufyan Garoushi | 41 | 488 | 15.7962963 |
| 180 | Tiziano Testori | 107 | 14 | 15.7664609 |
| 181 | Saman Warnakulasuriya | 95 | 25 | 15.7197001 |
| 182 | Ali Farahani | 38 | 583 | 15.671875 |
| 183 | Habib Benzian | 34 | 755 | 15.6135734 |
| 184 | Aj Feilzer | 80 | 56 | 15.55 |
| 185 | Stephen Porter | 87 | 39 | 15.5487528 |
| 186 | Ali Nosrat | 30 | 973 | 15.52 |
| 187 | Jorge Perdigao | 81 | 53 | 15.4411357 |
| 188 | Akimasa Tsujimoto | 38 | 583 | 15.4186851 |
| 189 | Asgeir Sigurdsson | 55 | 211 | 15.4023438 |
| 190 | Ricardo M Carvalho | 91 | 33 | 15.3524306 |
| 191 | Joseph Y Kan | 48 | 332 | 15.2488889 |
| 192 | Jamil Awad Shibli | 61 | 142 | 15.2194787 |
| 193 | N Silikas | 62 | 134 | 15.1640904 |
| 194 | Marcio Casati | 61 | 142 | 15.0994898 |
| 195 | Woosung Sohn | 42 | 462 | 15.0464 |
| 196 | Stefano Fedele | 56 | 196 | 15.0112 |
| 197 | Jacques Nor | 76 | 61 | 14.9714506 |
| 198 | Yan Wang | 34 | 755 | 14.9443359 |
| 199 | Thiago Saads Carvalho | 36 | 669 | 14.8947368 |
| 200 | Jae-Sung Kwon | 31 | 917 | 14.8284024 |
| 201 | Amid Ismail | 76 | 61 | 14.7662106 |
| 202 | Lakshman Samaranayake | 101 | 21 | 14.7539063 |
| 203 | Ye Ling | 38 | 583 | 14.7475 |
| 204 | Wasiu Lanre Adeyemo | 48 | 332 | 14.6942149 |
| 205 | Scribante Andrea | 49 | 314 | 14.6394558 |
| 206 | Alvaro Della Bona | 67 | 101 | 14.6115917 |
| 207 | Jepsen Søren | 89 | 37 | 14.272803 |
| 208 | Edward Ellis | 91 | 33 | 14.2120181 |
| 209 | Jenneke Klein-Nulend | 83 | 46 | 14.2025 |
| 210 | Shemesh H | 40 | 519 | 14.1818182 |
| 211 | Chaminda Jayampath Seneviratne | 43 | 432 | 14.1775 |
| 212 | Tarcília Aparecida Da Silva | 57 | 178 | 14.1186225 |
| 213 | Cristiano Susin | 58 | 165 | 14.078478 |
| 214 | Giuseppe Perinetti | 52 | 253 | 14.0378072 |
| 215 | Tae Ju Oh | 37 | 618 | 14.035124 |
| 216 | Anderson T Hara | 53 | 236 | 13.976 |
| 217 | Patricia Diaz-Moreno | 41 | 488 | 13.9513889 |
| 218 | Bastiaan P. Krom | 46 | 366 | 13.8732639 |
| 219 | Stefano Corbella | 36 | 669 | 13.8641975 |
| 220 | Lorenzo Franchi | 86 | 40 | 13.7143595 |
| 221 | Felipe Paiva Fonseca | 34 | 755 | 13.6712803 |
| 222 | Kamran Awan | 31 | 917 | 13.5822222 |
| 223 | Fabricio Mezzomo Collares | 37 | 618 | 13.5802469 |
| 224 | Trevor Steward | 34 | 755 | 13.3554688 |
| 225 | Venkateshbabu Nagendrababu | 38 | 583 | 13.2932099 |
| 226 | Ana Bedran Russo | 46 | 366 | 13.28125 |
| 227 | Thiago Machado Ardenghi | 50 | 293 | 13.2400756 |
| 228 | Janaina de Cássia Orlandi Sardi | 33 | 809 | 13.1800554 |
| 229 | Christoph Ramseier | 42 | 462 | 13.1538462 |
| 230 | Achille Tarsitano | 33 | 809 | 13.1484375 |
| 231 | Claudia Trindade Mattos | 31 | 917 | 13.1428571 |
| 232 | Razia Khammissa | 35 | 707 | 13.1211073 |
| 233 | Mario Pérez Sayáns | 31 | 917 | 13.1132813 |
| 234 | Duazary | 31 | 917 | 12.9925 |
| 235 | Jin Soo Ahn | 32 | 868 | 12.7889273 |
| 236 | Mine Koruyucu Yıldırım | 34 | 755 | 12.7773438 |
| 237 | Lucianne Cople Maia | 55 | 211 | 12.7466667 |
| 238 | Laurence J Walsh | 69 | 89 | 12.7376562 |
| 239 | Lucia Cevidanes | 62 | 134 | 12.7158203 |
| 240 | Raphael Freitas De Souza | 50 | 293 | 12.6864 |
| 241 | Egija Zaura | 46 | 366 | 12.6789536 |
| 242 | Marco Carrozzo | 58 | 165 | 12.6455078 |
| 243 | Chung How Kau | 51 | 276 | 12.5843195 |
| 244 | Eija Könönen | 57 | 178 | 12.5665748 |
| 245 | Jose Bagan | 73 | 75 | 12.530572 |
| 246 | Mariana Minatel Braga | 44 | 409 | 12.510397 |
| 247 | Fausto Medeiros Mendes | 58 | 165 | 12.4877778 |
| 248 | Josimeri Hebling | 63 | 132 | 12.4757786 |
| 249 | Stuart C White | 53 | 236 | 12.4593426 |
| 250 | Ana Estela Haddad | 34 | 755 | 12.4394464 |
| 251 | Yara Teresinha Corrêa Silva Sousa | 47 | 350 | 12.4322917 |
| 252 | David Williams | 51 | 276 | 12.4255983 |
| 253 | Pablo Agustin Vargas | 43 | 432 | 12.3639053 |
| 254 | Salvatore Sauro | 50 | 293 | 12.2721894 |
| 255 | Regina Guenka Palma Dibb | 47 | 350 | 12.224 |
| 256 | Patricia Pereira | 56 | 196 | 12.2015306 |
| 257 | Vittoria Perrotti | 47 | 350 | 12.1197917 |
| 258 | W Murray Thomson | 95 | 25 | 12.1079592 |
| 259 | Paolo Capparè | 39 | 555 | 12.0720222 |
| 260 | Ignacio Sanz Sanchez | 34 | 755 | 12.0702479 |
| 261 | Mevlüt Çelikoğlu | 40 | 519 | 12.0339506 |
| 262 | Taís De Souza Barbosa | 33 | 809 | 11.9537037 |
| 263 | Evandro Piva | 46 | 366 | 11.9392 |
| 264 | Yong Wang | 57 | 178 | 11.9366667 |
| 265 | Jung-Seok Lee | 34 | 755 | 11.9273356 |
| 266 | Paul M Speight | 80 | 56 | 11.8899793 |
| 267 | Carlos Flores Mir | 84 | 44 | 11.8441043 |
| 268 | Kaan Orhan | 49 | 314 | 11.7503429 |
| 269 | Gunnar E Carlsson | 118 | 6 | 11.7342012 |
| 270 | Lyndon Cooper | 66 | 110 | 11.7278393 |
| 271 | Sarah Kuehne | 32 | 868 | 11.675 |
| 272 | Martyn Cobourne | 53 | 236 | 11.6594388 |
| 273 | Paul W Major | 85 | 42 | 11.6315193 |
| 274 | Hee-Jin Kim | 55 | 211 | 11.6212279 |
| 275 | Ivo Krejci | 73 | 75 | 11.596875 |
| 276 | Todd Kuiken | 65 | 118 | 11.5900277 |
| 277 | Anne Marie Kuijpers-Jagtman | 83 | 46 | 11.5122873 |
| 278 | Enilson A Sallum | 64 | 126 | 11.5039063 |
| 279 | Daniela Garib | 43 | 432 | 11.473251 |
| 280 | Trombelli Leonardo | 62 | 134 | 11.4691358 |
| 281 | Mário Tanomaru Filho | 69 | 89 | 11.4514244 |
| 282 | Mario Alexandre Coelho Sinhoreti | 57 | 178 | 11.4422477 |
| 283 | Frederico Canato Martinho | 35 | 707 | 11.4359862 |
| 284 | Despina Koletsi | 31 | 917 | 11.4311111 |
| 285 | Sotirios Tetradis | 50 | 293 | 11.3804994 |
| 286 | Euiseong Kim | 47 | 350 | 11.359375 |
| 287 | Toru Takeshita | 34 | 755 | 11.2901235 |
| 288 | Christos Katsaros | 61 | 142 | 11.2819979 |
| 289 | Claudio R Leles | 46 | 366 | 11.2806183 |
| 290 | Jaime A Cury | 82 | 50 | 11.2593934 |
| 291 | Margherita Fontana | 50 | 293 | 11.2351717 |
| 292 | Brenda Gomes | 57 | 178 | 11.1992654 |
| 293 | Rogerio M Castilho | 40 | 519 | 11.1909722 |
| 294 | Guglielmo Campus | 50 | 293 | 11.1724138 |
| 295 | Lourenço Correr Sobrinho | 57 | 178 | 11.1466667 |
| 296 | Justin Durham | 41 | 488 | 11.0362812 |
| 297 | Giampiero Rossi Fedele | 34 | 755 | 11.0166205 |
| 298 | Tolga Fikret Tozum | 43 | 432 | 10.9895833 |
| 299 | Loc Do | 36 | 669 | 10.9886621 |
| 300 | Nick Jakubovics | 40 | 519 | 10.9135803 |
| 301 | Carolina Castro Martins | 44 | 409 | 10.8888889 |
| 302 | Alessandro Vichi | 51 | 276 | 10.8847656 |
| 303 | Sema Belli | 50 | 293 | 10.8751715 |
| 304 | Aldiéris Alves Pesqueira | 35 | 707 | 10.867284 |
| 305 | Richard M Logan | 48 | 332 | 10.866941 |
| 306 | Soares DG | 37 | 618 | 10.8611111 |
| 307 | Leonardo Perez Faverani | 32 | 868 | 10.7577855 |
| 308 | Mariano Sanz | 107 | 14 | 10.7378702 |
| 309 | Nikos Mattheos | 44 | 409 | 10.6614583 |
| 310 | Chengfei Zhang | 47 | 350 | 10.5982143 |
| 311 | Yasuhiro Kobayashi | 45 | 389 | 10.5872781 |
| 312 | Antonella Polimeni | 64 | 126 | 10.5675676 |
| 313 | Dennis Tarnow | 74 | 70 | 10.5603299 |
| 314 | Isaac Suzart Gomes Filho | 34 | 755 | 10.5512465 |
| 315 | Christoph Bourauel | 56 | 196 | 10.5118367 |
| 316 | Hyeon Cheol Kim | 41 | 488 | 10.5044379 |
| 317 | Ziad Salameh | 33 | 809 | 10.4487535 |
| 318 | Nikolaos G Nikitakis | 44 | 409 | 10.421875 |
| 319 | Eliete Guerra | 40 | 519 | 10.4045369 |
| 320 | William Wade | 64 | 126 | 10.3693827 |
| 321 | Frank Scannapieco | 65 | 118 | 10.3622449 |
| 322 | Paul MH Dummer | 82 | 50 | 10.3517429 |
| 323 | Shahriar Shahi | 40 | 519 | 10.3175 |
| 324 | Brent Larson | 33 | 809 | 10.2731921 |
| 325 | Daniela Rios | 47 | 350 | 10.2411243 |
| 326 | Roger Keller Celeste | 44 | 409 | 10.2334184 |
| 327 | Tze Ta Huang | 90 | 36 | 10.1730915 |
| 328 | Paul Abbott | 67 | 101 | 10.1314924 |
| 329 | Lars Andersson | 61 | 142 | 10.1179016 |
| 330 | Paulo Francisco Cesar | 45 | 389 | 10.1083676 |
| 331 | Anil Kishen | 62 | 134 | 10.0710204 |
| 332 | Marcelo Goiato | 56 | 196 | 10.0390625 |
| 333 | Mohamed Bayome | 30 | 973 | 10.0311111 |
| 334 | Lior Shapira | 54 | 227 | 10.000625 |
| 335 | Marzieh Alikhasi | 34 | 755 | 9.93518519 |
| 336 | Ronald Ordinola Zapata | 50 | 293 | 9.90828402 |
| 337 | Paolo M Cattaneo | 35 | 707 | 9.85255199 |
| 338 | Heinz Theo Lübbers | 36 | 669 | 9.85 |
| 339 | Dennis Cvitkovitch | 58 | 165 | 9.84256055 |
| 340 | Sivapathasundharam B | 35 | 707 | 9.83931947 |
| 341 | Gianrico Spagnuolo | 51 | 276 | 9.81111111 |
| 342 | Josette Camilleri | 66 | 110 | 9.76125 |
| 343 | Mannocci F | 62 | 134 | 9.72169467 |
| 344 | Hyun Mo Ryoo | 52 | 253 | 9.6955102 |
| 345 | Hyo Sang Park | 45 | 389 | 9.68962351 |
| 346 | Catherine F Poh | 38 | 583 | 9.61458333 |
| 347 | Nikolaos Pandis | 63 | 132 | 9.60847334 |
| 348 | Ivan B Darby | 35 | 707 | 9.5472 |
| 349 | Vita Machiulskiene | 35 | 707 | 9.5 |
| 350 | Tien Min Gabriel Chu | 35 | 707 | 9.46016647 |
| 351 | Alessandro Leite Cavalcanti | 38 | 583 | 9.44526627 |
| 352 | Guilherme Janson | 60 | 151 | 9.44125 |
| 353 | Yongchul Bae | 52 | 253 | 9.41894531 |
| 354 | Soraya Coelho Leal | 48 | 332 | 9.37217598 |
| 355 | Lívia Azeredo A Antunes | 32 | 868 | 9.36288089 |
| 356 | Newell Johnson | 92 | 30 | 9.33480749 |
| 357 | Débora Alves Nunes Leite Lima | 31 | 917 | 9.33240997 |
| 358 | Elif Bahar Tuna | 32 | 868 | 9.32407407 |
| 359 | Fernanda Carvalho Panzeri Pires De Souza | 34 | 755 | 9.305 |
| 360 | Luiz Felipe Valandro | 69 | 89 | 9.30160619 |
| 361 | Kenio Costa De Lima | 57 | 178 | 9.27918367 |
| 362 | Michael Mccullough | 51 | 276 | 9.27734375 |
| 363 | Rafael Rodrigues Lima|Rafael R Lima, R R Lima | 38 | 583 | 9.27479339 |
| 364 | Moharamzadeh K | 31 | 917 | 9.2475 |
| 365 | Stephen Challacombe | 81 | 53 | 9.20256319 |
| 366 | Keith Kirkwood | 44 | 409 | 9.16695502 |
| 367 | Dag Ørstavik | 70 | 85 | 9.15340254 |
| 368 | Andre Figueiredo Reis | 33 | 809 | 9.13194444 |
| 369 | Rodrigo A Giacaman | 36 | 669 | 9.11564626 |
| 370 | Wenche S Borgnakke | 35 | 707 | 9.11183674 |
| 371 | Anders Johansson | 89 | 37 | 9.1090535 |
| 372 | Marcelo Bönecker | 50 | 293 | 9.10644531 |
| 373 | Bill Kahler | 36 | 669 | 9.0704 |
| 374 | Perry Klokkevold | 40 | 519 | 9.0348455 |
| 375 | Emmanuel João Nogueira Leal da Silva | 57 | 178 | 9.01697531 |
| 376 | Fábio Luiz Mialhe | 37 | 618 | 8.99305556 |
| 377 | Isabela Pordeus | 69 | 89 | 8.97714681 |
| 378 | John Timothy Wright | 55 | 211 | 8.95800781 |
| 379 | Estevam Augusto Bonfante | 49 | 314 | 8.95684114 |
| 380 | Sankara Narayanan | 55 | 211 | 8.94809689 |
| 381 | Hector Rios | 34 | 755 | 8.9232 |
| 382 | Paulo Vinícius Soares | 31 | 917 | 8.90909091 |
| 383 | Altair Antoninha Del Bel Cury | 65 | 118 | 8.89127424 |
| 384 | Saeed Rahimi | 39 | 555 | 8.88435374 |
| 385 | Lj Jin | 65 | 118 | 8.87150506 |
| 386 | Luis Felipe Schneider | 33 | 809 | 8.8707483 |
| 387 | Kim A Brogden | 56 | 196 | 8.85106383 |
| 388 | Ashraf Fouad | 58 | 165 | 8.83755102 |
| 389 | Jin Woo Park | 42 | 462 | 8.8125 |
| 390 | Mark S Gilthorpe | 52 | 253 | 8.80882353 |
| 391 | Zafer Cavit Çehreli | 50 | 293 | 8.79777778 |
| 392 | João Eduardo Gomes Filho | 47 | 350 | 8.78994083 |
| 393 | Gülnur Emingil | 44 | 409 | 8.77810651 |
| 394 | Susan Rittling | 57 | 178 | 8.74241523 |
| 395 | Roberto Rotundo | 36 | 669 | 8.70510397 |
| 396 | Francesco Inchingolo | 46 | 366 | 8.69824219 |
| 397 | Lars Rasmusson | 42 | 462 | 8.68686869 |
| 398 | Yoon Jeong Choi | 33 | 809 | 8.66481995 |
| 399 | Owen Addison | 34 | 755 | 8.64172336 |
| 400 | Mario Taba Junior | 54 | 227 | 8.54584775 |
| 401 | Eduardo Bernabé | 77 | 59 | 8.54277954 |
| 402 | Manoel Damião Sousa Neto | 77 | 59 | 8.52059756 |
| 403 | Miguel Peñarrocha Diago | 66 | 110 | 8.50623583 |
| 404 | Wander José Da Silva | 33 | 809 | 8.49584488 |
| 405 | Iris Do Céu Clara Costa | 35 | 707 | 8.49433107 |
| 406 | Hamed Mortazavi | 31 | 917 | 8.4675 |
| 407 | Frauke Müller | 59 | 161 | 8.44408163 |
| 408 | Kelun Wang | 42 | 462 | 8.41863905 |
| 409 | Mauro Farella | 51 | 276 | 8.41727367 |
| 410 | Heitor Marques Honório | 37 | 618 | 8.41420118 |
| 411 | Antonio Luiz Barbosa Pinheiro | 53 | 236 | 8.4083045 |
| 412 | J Mark Thomason | 55 | 211 | 8.4065097 |
| 413 | Leonardo Dos Santos Antunes | 33 | 809 | 8.4 |
| 414 | Graziela De Luca Canto | 48 | 332 | 8.38763377 |
| 415 | Flares Baratto Filho | 33 | 809 | 8.37618147 |
| 416 | Abdul Samad Khan | 31 | 917 | 8.375 |
| 417 | Craig S Miller | 56 | 196 | 8.36375 |
| 418 | W Keung Leung | 56 | 196 | 8.3615917 |
| 419 | Rafael Scaf De Molon | 30 | 973 | 8.34876543 |
| 420 | Luis E Chávez De Paz | 30 | 973 | 8.3161157 |
| 421 | Karine Laura Cortellazzi | 31 | 917 | 8.28395062 |
| 422 | Dongxia Ye | 36 | 669 | 8.2675 |
| 423 | Angus Walls | 57 | 178 | 8.2642998 |
| 424 | André Luiz Fraga Briso | 38 | 583 | 8.2624 |
| 425 | Thimios Mitsiadis | 58 | 165 | 8.25 |
| 426 | Kotaro Maki | 41 | 488 | 8.23305589 |
| 427 | Juliano Pessan | 37 | 618 | 8.23090278 |
| 428 | Faruk Ayhan Başçiftçi | 37 | 618 | 8.19097222 |
| 429 | Marco Ferrari | 116 | 8 | 8.17591499 |
| 430 | In Sung Yeo | 36 | 669 | 8.13799622 |
| 431 | Fernando Oliveira Costa | 52 | 253 | 8.1349481 |
| 432 | Andreas Filippi | 49 | 314 | 8.12764004 |
| 433 | John D Bartlett | 55 | 211 | 8.10956903 |
| 434 | Cecilia Pedroso Turssi | 38 | 583 | 8.06804734 |
| 435 | Prasit Pavasant | 48 | 332 | 8.0541103 |
| 436 | Cesar Arrais | 35 | 707 | 8.0415879 |
| 437 | Stavros Kiliaridis | 70 | 85 | 8.03212374 |
| 438 | sheila cavalca cortelli | 40 | 519 | 8.0032 |
| 439 | Dwomoa Adu | 65 | 118 | 7.99555556 |
| 440 | Gianluca Martino Tartaglia | 48 | 332 | 7.96972656 |
| 441 | Giulio Rasperini | 50 | 293 | 7.95775941 |
| 442 | Marcio De Moraes | 39 | 555 | 7.95266272 |
| 443 | Christian S Stohler | 52 | 253 | 7.92820248 |
| 444 | David C Coleman | 76 | 61 | 7.90878801 |
| 445 | Daniela Elena Costea | 34 | 755 | 7.90289256 |
| 446 | Kristine Deleon Pennell | 34 | 755 | 7.89256198 |
| 447 | Tariq Abduljabbar | 40 | 519 | 7.89179548 |
| 448 | Rogerio De Castilho Jacinto | 33 | 809 | 7.8553719 |
| 449 | Daniel Graf | 39 | 555 | 7.84570313 |
| 450 | Kyung Mi Woo | 42 | 462 | 7.81688466 |
| 451 | Mark S Wolff | 40 | 519 | 7.78961601 |
| 452 | Peter Parashos | 43 | 432 | 7.77469388 |
| 453 | Marcelle Nascimento | 31 | 917 | 7.76033058 |
| 454 | Carlos Eduardo Da Silveira Bueno | 45 | 389 | 7.74777778 |
| 455 | Inmaculada Tomas Carmona | 45 | 389 | 7.74211248 |
| 456 | Olivier Huck | 30 | 973 | 7.73469388 |
| 457 | Hm Wong | 41 | 488 | 7.73076923 |
| 458 | Lewei Zhang | 47 | 350 | 7.71626298 |
| 459 | Flávio Henrique Baggio Aguiar | 40 | 519 | 7.70919067 |
| 460 | Aline De Almeida Neves | 35 | 707 | 7.69897959 |
| 461 | Tommaso Castroflorio | 38 | 583 | 7.6760355 |
| 462 | Matthias Zehnder | 60 | 151 | 7.67555556 |
| 463 | Fábio Renato Manzolli Leite | 35 | 707 | 7.66942149 |
| 464 | Naser Aslaminabad | 30 | 973 | 7.65740741 |
| 465 | Marcio Mateus Beloti | 35 | 707 | 7.62326389 |
| 466 | Kuo-Wei Chang | 60 | 151 | 7.61061225 |
| 467 | Erika Benavides | 30 | 973 | 7.6016 |
| 468 | Wirley Gonçalves Assunção | 42 | 462 | 7.60082305 |
| 469 | Saul Paiva | 79 | 58 | 7.59323337 |
| 470 | Américo Bortolazzo Correr | 34 | 755 | 7.56818182 |
| 471 | Lars Bondemark | 51 | 276 | 7.56738281 |
| 472 | Kannan Ranganathan | 39 | 555 | 7.55648038 |
| 473 | Belmiro Cavalcanti Do Egito Vasconcelos | 41 | 488 | 7.55229592 |
| 474 | George Eliades | 66 | 110 | 7.54669839 |
| 475 | Rachel Badovinac Ramoni | 39 | 555 | 7.53994083 |
| 476 | Karim Fawzy El Sayed | 30 | 973 | 7.5375 |
| 477 | Mustafa Naseem | 33 | 809 | 7.53061225 |
| 478 | Argy Polychronopoulou | 52 | 253 | 7.49011446 |
| 479 | Silmara Aparecida Milori Corona | 42 | 462 | 7.47337278 |
| 480 | Jung Il Chae | 33 | 809 | 7.46280992 |
| 481 | Danyel Elias Da Cruz Perez | 40 | 519 | 7.4408284 |
| 482 | Carlo Maiorana | 48 | 332 | 7.42367347 |
| 483 | Simone Grandini | 43 | 432 | 7.41503906 |
| 484 | Alyne Simões Gonçalves | 31 | 917 | 7.3933518 |
| 485 | Alessandra Buhler Borges | 37 | 618 | 7.3872 |
| 486 | Peer Kämmerer | 41 | 488 | 7.37860082 |
| 487 | Mohamed Al Shabrawey | 40 | 519 | 7.36686391 |
| 488 | Ananda Dasanayake | 42 | 462 | 7.35449219 |
| 489 | David L Gast | 72 | 80 | 7.3392 |
| 490 | Paulo Henrique Dos Santos | 36 | 669 | 7.33159722 |
| 491 | Francisco C Groppo | 45 | 389 | 7.31217482 |
| 492 | Annika Antonsson | 35 | 707 | 7.312 |
| 493 | Lars Bjørndal | 42 | 462 | 7.3030303 |
| 494 | Anthony Damien Walmsley | 61 | 142 | 7.27959548 |
| 495 | Athanassios Kyrgidis | 41 | 488 | 7.25976563 |
| 496 | Ana Carolina Magalhães | 57 | 178 | 7.25127831 |
| 497 | Delgado Ruiz Ra | 33 | 809 | 7.22675737 |
| 498 | Rafael Guerra Lund | 34 | 755 | 7.19628099 |
| 499 | Marco Salerno | 41 | 488 | 7.18888889 |
| 500 | Yuelian Liu | 33 | 809 | 7.1872 |
| 501 | Marcia Martins Marques | 52 | 253 | 7.18421053 |
| 502 | Tao Jiang | 33 | 809 | 7.17881944 |
| 503 | Juan J. Segura-Egea | 51 | 276 | 7.17714286 |
| 504 | Gisele Maria Correr | 35 | 707 | 7.15689981 |
| 505 | Chaushu G | 57 | 178 | 7.09934259 |
| 506 | Simon D Tran | 46 | 366 | 7.08324662 |
| 507 | Vicente Castelo Branco Leitune | 32 | 868 | 7.07936508 |
| 508 | Edgard Graner | 50 | 293 | 7.06795225 |
| 509 | Toru Yanagawa | 42 | 462 | 7.05955679 |
| 510 | Jesus Alberto Hernandez Silva | 39 | 555 | 7.03171191 |
| 511 | Arndt Guentsch | 32 | 868 | 7.03099174 |
| 512 | Bassel Tarakji | 31 | 917 | 7.01133787 |
| 513 | Daniela Bazan Palioto | 38 | 583 | 6.99408284 |
| 514 | Gustafsson Anders | 58 | 165 | 6.96055227 |
| 515 | Shuo Chen | 48 | 332 | 6.9357195 |
| 516 | Shane N White | 53 | 236 | 6.92330168 |
| 517 | José Roberto Pereira Lauris | 51 | 276 | 6.89814815 |
| 518 | Xuebin Yang | 41 | 488 | 6.89060642 |
| 519 | Zoe Marshman | 40 | 519 | 6.85059172 |
| 520 | Domenick Zero | 70 | 85 | 6.82805269 |
| 521 | Gaviao M | 53 | 236 | 6.82785467 |
| 522 | Haiter Neto F | 49 | 314 | 6.80017301 |
| 523 | KY Anh Nguyen | 31 | 917 | 6.79340278 |
| 524 | Richard David Cannon | 52 | 253 | 6.78254848 |
| 525 | Marcia Carneiro Valera | 43 | 432 | 6.76444444 |
| 526 | Paulo Nelson Filho | 43 | 432 | 6.74012856 |
| 527 | Jung Yul Cha | 34 | 755 | 6.73662551 |
| 528 | Savabi O | 36 | 669 | 6.70699433 |
| 529 | Kıvanç Kamburoğlu | 36 | 669 | 6.70507545 |
| 530 | Leonardo Ciocca | 35 | 707 | 6.6875 |
| 531 | Manabu Kanazawa | 31 | 917 | 6.66540643 |
| 532 | Lim Kwong Cheung | 50 | 293 | 6.64353543 |
| 533 | Francesca Gori | 30 | 973 | 6.62555556 |
| 534 | Anastasios Kanatas | 39 | 555 | 6.625 |
| 535 | Paul Cooper | 65 | 118 | 6.61979167 |
| 536 | Rui Figueiredo | 40 | 519 | 6.61831153 |
| 537 | Conchita Martin | 31 | 917 | 6.61593341 |
| 538 | Chan Ho Park | 30 | 973 | 6.59722222 |
| 539 | Tae Geon Kwon | 35 | 707 | 6.57193817 |
| 540 | Luís Otávio Miranda Cota | 35 | 707 | 6.55967078 |
| 541 | Sérgio Vitorino Cardoso | 30 | 973 | 6.535 |
| 542 | Steven Brookes | 43 | 432 | 6.49121094 |
| 543 | Doglas Cecchin | 31 | 917 | 6.48 |
| 544 | Khalid Almas | 54 | 227 | 6.45567867 |
| 545 | 有地榮一郎 | 56 | 196 | 6.44675788 |
| 546 | Giuseppe Alexandre Romito | 34 | 755 | 6.44589774 |
| 547 | Eduardo Piza Pellizzer | 52 | 253 | 6.44390582 |
| 548 | A Jäger | 57 | 178 | 6.44378346 |
| 549 | Neil Meredith | 32 | 868 | 6.44259369 |
| 550 | Raman Bedi | 60 | 151 | 6.40079365 |
| 551 | Fernanda Salum | 33 | 809 | 6.39886578 |
| 552 | Francisco Montagner | 32 | 868 | 6.3875 |
| 553 | Frank Lippert | 34 | 755 | 6.38541667 |
| 554 | Edward Lynch | 55 | 211 | 6.38375 |
| 555 | Carlos Rodriguez | 55 | 211 | 6.3712 |
| 556 | Massimo De Sanctis | 45 | 389 | 6.35042735 |
| 557 | Ki Beom Kim | 33 | 809 | 6.34782609 |
| 558 | Harald O Heymann | 50 | 293 | 6.34074074 |
| 559 | José María Montiel-Company | 37 | 618 | 6.3376 |
| 560 | Lidiany Rodrigues | 36 | 669 | 6.32780612 |
| 561 | Pedro Bullon | 53 | 236 | 6.30263158 |
| 562 | Paul Brunton | 44 | 409 | 6.26660156 |
| 563 | Kathryn A Atchison | 48 | 332 | 6.24722992 |
| 564 | Angray Kang | 31 | 917 | 6.24375 |
| 565 | Ewerton Garcia De Oliveira Mima | 31 | 917 | 6.2244898 |
| 566 | Charles Goodacre | 64 | 126 | 6.21991542 |
| 567 | Shanon patel | 56 | 196 | 6.2095971 |
| 568 | Renate Lux | 47 | 350 | 6.20588235 |
| 569 | Kum Kee Yeon | 50 | 293 | 6.1816609 |
| 570 | MS Duggal | 51 | 276 | 6.16280864 |
| 571 | Sue Pavitt Nee Rider | 45 | 389 | 6.13149244 |
| 572 | Javier Martín | 31 | 917 | 6.12018141 |
| 573 | Sandra Helena Penha De Oliveira | 40 | 519 | 6.11755102 |
| 574 | Christos Boutsioukis | 30 | 973 | 6.11538462 |
| 575 | Marcelo Ferrarezi De Andrade | 35 | 707 | 6.10939358 |
| 576 | Serge Bouillaguet | 44 | 409 | 6.09061225 |
| 577 | Mohammad Samiei | 39 | 555 | 6.07317073 |
| 578 | Evandro Watanabe | 33 | 809 | 6.06238185 |
| 579 | Carlos Alberto Feldens | 44 | 409 | 6.05877551 |
| 580 | Mônica Campos Serra | 47 | 350 | 6.03703704 |
| 581 | Ana Cecília Corrêa Aranha | 40 | 519 | 6.01530612 |
| 582 | Jean Christophe Farges | 32 | 868 | 6.0059453 |
| 583 | Young Kyung Kim | 34 | 755 | 5.99852071 |
| 584 | Marie Therese Flores | 39 | 555 | 5.97902494 |
| 585 | Ronald W Wood | 39 | 555 | 5.97485207 |
| 586 | Edmond Pow | 34 | 755 | 5.9744898 |
| 587 | Boaz Arzi | 32 | 868 | 5.953125 |
| 588 | Mohammad Khursheed Alam | 43 | 432 | 5.938125 |
| 589 | Nadim Z Baba | 32 | 868 | 5.912 |
| 590 | David Penarrocha-Oltra | 46 | 366 | 5.89142857 |
| 591 | Chris Deery | 39 | 555 | 5.88521579 |
| 592 | Fawad Javed | 64 | 126 | 5.87867814 |
| 593 | Claudio Marchetti | 60 | 151 | 5.87061728 |
| 594 | Luís Eduardo Silva Soares | 32 | 868 | 5.85950413 |
| 595 | Enrico Gherlone | 54 | 227 | 5.83875 |
| 596 | Daniel Torres-Lagares | 46 | 366 | 5.82204082 |
| 597 | John Yoo | 43 | 432 | 5.7943067 |
| 598 | Pia Lopez Jornet | 49 | 314 | 5.79254931 |
| 599 | David G Gillam | 40 | 519 | 5.77076125 |
| 600 | Guy Willems | 73 | 75 | 5.76097394 |
| 601 | Masamichi Takami 高見正道 | 36 | 669 | 5.74530612 |
| 602 | Marco Antonio Hungaro Duarte | 75 | 66 | 5.7437518 |
| 603 | Elham S Abu Alhaija | 34 | 755 | 5.72290809 |
| 604 | Debora Barros Barbosa | 32 | 868 | 5.71893491 |
| 605 | Hakan Turkkahraman | 33 | 809 | 5.69791667 |
| 606 | Silvia Cristina Núñez | 30 | 973 | 5.68861454 |
| 607 | Keiji Moriyama | 45 | 389 | 5.68132716 |
| 608 | José Fernando Castanha Henriques | 55 | 211 | 5.67950617 |
| 609 | Paula Cristina Trevilatto | 42 | 462 | 5.64565993 |
| 610 | Paulo Conti | 54 | 227 | 5.633125 |
| 611 | Rubens Spin Neto | 39 | 555 | 5.6313912 |
| 612 | Hae-Hyoung Lee | 38 | 583 | 5.62117347 |
| 613 | Her Hsiung Huang | 41 | 488 | 5.60666667 |
| 614 | Tonino Traini | 38 | 583 | 5.60145682 |
| 615 | Livia Ma Tenuta | 42 | 462 | 5.6 |
| 616 | Paul Lam Corstjens | 52 | 253 | 5.55161078 |
| 617 | Masae Kuboniwa | 40 | 519 | 5.53864447 |
| 618 | Carlos F Santos | 43 | 432 | 5.52066116 |
| 619 | Abel García García | 54 | 227 | 5.51108033 |
| 620 | Renata Cunha Matheus Rodrigues Garcia | 36 | 669 | 5.48214286 |
| 621 | Shohei Kasugai | 52 | 253 | 5.47888162 |
| 622 | Patricia Moreira De Freitas | 33 | 809 | 5.47569444 |
| 623 | Jesus Torres Garcia-Denche | 33 | 809 | 5.4688 |
| 624 | Joseph Wedekind | 38 | 583 | 5.45888889 |
| 625 | Velasco-Ortega E | 38 | 583 | 5.44238281 |
| 626 | Bernhard Ganss | 33 | 809 | 5.44117647 |
| 627 | Galen B Schneider | 33 | 809 | 5.42333333 |
| 628 | Roberts Thomson K | 39 | 555 | 5.41308594 |
| 629 | Dorina Lauritano | 37 | 618 | 5.40894901 |
| 630 | Shinoda Masamichi | 37 | 618 | 5.4 |
| 631 | Roberto Ruggiero Braga | 60 | 151 | 5.39238166 |
| 632 | wael sabbah | 35 | 707 | 5.38293444 |
| 633 | Abdalla Abdal hay | 34 | 755 | 5.3824 |
| 634 | Carlos Nemcovsky | 47 | 350 | 5.37345679 |
| 635 | Jacks Jorge | 34 | 755 | 5.37037037 |
| 636 | Leticia Helena Theodoro | 36 | 669 | 5.36479592 |
| 637 | Marcelo Ferraz Mesquita | 41 | 488 | 5.35691988 |
| 638 | Keerthilatha M Pai | 32 | 868 | 5.33928571 |
| 639 | Rodrigo Vivan | 38 | 583 | 5.3293698 |
| 640 | Teresa A Dolan | 31 | 917 | 5.31542969 |
| 641 | Maryam Amin | 31 | 917 | 5.30371901 |
| 642 | Wanninayake Mudiyanselage Tilakaratne | 42 | 462 | 5.30040816 |
| 643 | Tarek El Bialy | 35 | 707 | 5.27514793 |
| 644 | Patricia McGettigan | 34 | 755 | 5.2700831 |
| 645 | Gisele Faria | 38 | 583 | 5.23593964 |
| 646 | James Kit Hon Tsoi | 34 | 755 | 5.1843044 |
| 647 | Celine M Levesque | 32 | 868 | 5.18002081 |
| 648 | Joni Augusto Cirelli | 46 | 366 | 5.16 |
| 649 | Rory M Watt | 33 | 809 | 5.13717421 |
| 650 | Cynthia Pine | 46 | 366 | 5.13492064 |
| 651 | Reuben Kim | 37 | 618 | 5.13017752 |
| 652 | Figen Seymen | 40 | 519 | 5.12722949 |
| 653 | Carla Castiglia Gonzaga | 34 | 755 | 5.0880102 |
| 654 | Cristiane Duque | 32 | 868 | 5.08159722 |
| 655 | Francesca Angiero | 31 | 917 | 5.05671078 |
| 656 | Regina Puppin Rontani | 46 | 366 | 5.04528853 |
| 657 | Elcio Marcantonio Junior | 53 | 236 | 5.019375 |
| 658 | Richard B Price | 55 | 211 | 5.018125 |
| 659 | Ana Paula Vieira Colombo | 43 | 432 | 5.01697531 |
| 660 | Souichi Yanamoto | 34 | 755 | 5.01234568 |
| 661 | Mahmoud Al Omiri | 37 | 618 | 5.00292969 |
| 662 | Leandro Silva Marques | 46 | 366 | 5.00146092 |
| 663 | Yong Dae Kwon | 32 | 868 | 4.96449704 |
| 664 | Warwick Duncan | 33 | 809 | 4.94040816 |
| 665 | Harvey A Schenkein | 56 | 196 | 4.92664931 |
| 666 | Roy George | 31 | 917 | 4.92318244 |
| 667 | Antonio Carrassi | 51 | 276 | 4.91802469 |
| 668 | RP Allaker | 41 | 488 | 4.88340274 |
| 669 | Sıddık Malkoç | 31 | 917 | 4.87847222 |
| 670 | Jose Luis Gutierrez Perez | 69 | 89 | 4.87694637 |
| 671 | Oslei Paes De Almeida | 60 | 151 | 4.8638546 |
| 672 | Mubassar Fida | 31 | 917 | 4.84548611 |
| 673 | Lauren L Patton | 50 | 293 | 4.8361678 |
| 674 | Maria Da Gloria Chiarello De Mattos | 35 | 707 | 4.82304527 |
| 675 | Thais Marchini Oliveira | 51 | 276 | 4.80584391 |
| 676 | Sema Hakkı | 33 | 809 | 4.72189349 |
| 677 | Luciana Shaddox | 32 | 868 | 4.72048611 |
| 678 | Erick Souza | 43 | 432 | 4.71808999 |
| 679 | Rubens Ferreira De Albuquerque Junior | 35 | 707 | 4.71467764 |
| 680 | Sajeda Meghji | 49 | 314 | 4.68707483 |
| 681 | Jane A Weintraub | 48 | 332 | 4.68679717 |
| 682 | Asbjørn Jokstad | 43 | 432 | 4.68213296 |
| 683 | Vanessa Soares Lara | 36 | 669 | 4.66836735 |
| 684 | Yanqi Yang | 30 | 973 | 4.66145833 |
| 685 | Mauro Henrique Abreu | 47 | 350 | 4.65875 |
| 686 | Rainer Haak | 36 | 669 | 4.63971463 |
| 687 | Nada Farouk Ahmed Atta | 41 | 488 | 4.62456747 |
| 688 | Pertti Pirttiniemi | 43 | 432 | 4.61632653 |
| 689 | Mohamed Ibrahim Abu Hassan | 35 | 707 | 4.61555556 |
| 690 | Carlos Gonzalez Cabezas | 39 | 555 | 4.58300781 |
| 691 | Yasemin Özkan | 41 | 488 | 4.56657484 |
| 692 | Youssef Haïkel | 49 | 314 | 4.54875283 |
| 693 | Shinn Jyh Ding | 49 | 314 | 4.54565376 |
| 694 | Carlos José Soares | 66 | 110 | 4.52942925 |
| 695 | Rosnah Zain | 48 | 332 | 4.51247166 |
| 696 | Thomas Gh Diekwisch | 40 | 519 | 4.50612245 |
| 697 | Léa Assed Bezerra Da Silva | 67 | 101 | 4.50502729 |
| 698 | Moschos A Papadopoulos | 41 | 488 | 4.50231482 |
| 699 | Linda Wang | 36 | 669 | 4.48870392 |
| 700 | Flávio Domingues Das Neves | 30 | 973 | 4.48596939 |
| 701 | Amaury Pozos Guillén | 38 | 583 | 4.48163265 |
| 702 | Sérgio Scombatti De Souza | 52 | 253 | 4.47593294 |
| 703 | Youn Hee Choi | 30 | 973 | 4.4544 |
| 704 | Lynne Bingle | 34 | 755 | 4.44444444 |
| 705 | John Brunski | 45 | 389 | 4.42824808 |
| 706 | Ahmed Samy | 32 | 868 | 4.40587695 |
| 707 | Viviane Colares | 30 | 973 | 4.39780521 |
| 708 | Nobuhiro Hanada | 49 | 314 | 4.39256198 |
| 709 | Toru Nikaido | 58 | 165 | 4.38525614 |
| 710 | Junia Serra Negra | 35 | 707 | 4.36222222 |
| 711 | Paulo Floriani Kramer | 37 | 618 | 4.35380623 |
| 712 | Helena De Freitas Oliveira Paranhos | 46 | 366 | 4.3355102 |
| 713 | Ender Kazazoğlu | 35 | 707 | 4.32897959 |
| 714 | Carlos De Paula Eduardo | 61 | 142 | 4.32618343 |
| 715 | Halil Erhan Fıratlı | 41 | 488 | 4.32163265 |
| 716 | Kristiina Heikinheimo | 37 | 618 | 4.304405 |
| 717 | Hs Brand | 47 | 350 | 4.29 |
| 718 | Clay Walker | 62 | 134 | 4.26905456 |
| 719 | Marco Cune | 45 | 389 | 4.25396825 |
| 720 | June Nunn | 51 | 276 | 4.24888889 |
| 721 | Brian W Darvell | 55 | 211 | 4.24563902 |
| 722 | Liviu Feller | 42 | 462 | 4.23822715 |
| 723 | Ana Flavia Granville Garcia | 40 | 519 | 4.21767714 |
| 724 | Fabio Daumas Nunes | 44 | 409 | 4.21121884 |
| 725 | Hiroshi Ogawa | 34 | 755 | 4.19492503 |
| 726 | Simone Cecilio Hallak Regalo | 35 | 707 | 4.19335938 |
| 727 | Maria Aparecida Andrade Moreira Machado | 49 | 314 | 4.18222222 |
| 728 | Clovis Monteiro Bramante | 67 | 101 | 4.17266851 |
| 729 | Petros Koidis | 43 | 432 | 4.16274238 |
| 730 | Pascal Van Lieshout | 42 | 462 | 4.15673469 |
| 731 | Arthur Belém Novaes Júnior | 62 | 134 | 4.1533801 |
| 732 | Fabiana Mantovani Gomes França | 30 | 973 | 4.11796982 |
| 733 | James K Hartsfield Jr | 43 | 432 | 4.11 |
| 734 | Norman Tinanoff | 53 | 236 | 4.10724852 |
| 735 | Timothy G Bromage | 50 | 293 | 4.08109504 |
| 736 | Vivek Shetty | 39 | 555 | 4.08108108 |
| 737 | Jae Gyu Jeon | 30 | 973 | 4.08093279 |
| 738 | Debora C Matthews | 31 | 917 | 4.07180021 |
| 739 | Ravindra Nanda | 59 | 161 | 4.06710744 |
| 740 | Keson Tan | 36 | 669 | 4.043125 |
| 741 | Baek Il Kim | 31 | 917 | 4.02888889 |
| 742 | S Jeffrey Dixon | 55 | 211 | 4.01124531 |
| 743 | Saeed Asgary | 58 | 165 | 3.96570645 |
| 744 | Luciana Corrêa | 31 | 917 | 3.960761 |
| 745 | Darnell Kaigler | 34 | 755 | 3.95221607 |
| 746 | Titus Schleyer, Dmd | 36 | 669 | 3.94824219 |
| 747 | Marcio Ajudarte Lopes | 54 | 227 | 3.93621399 |
| 748 | Branca Heloisa Oliveira | 34 | 755 | 3.9220679 |
| 749 | Bruce Pihlstrom | 42 | 462 | 3.91603306 |
| 750 | Luciano Cintra | 45 | 389 | 3.89875082 |
| 751 | Heng Li Huang | 44 | 409 | 3.89506173 |
| 752 | Giuseppe Siciliani | 45 | 389 | 3.891875 |
| 753 | Jan Eirik Ellingsen | 42 | 462 | 3.89049587 |
| 754 | Carlos Henrique Ribeiro Camargo | 34 | 755 | 3.89013841 |
| 755 | Bahar Eren Kuru | 30 | 973 | 3.87327824 |
| 756 | Kenji Fueki | 32 | 868 | 3.87158145 |
| 757 | Martine Hennequin | 43 | 432 | 3.84072022 |
| 758 | Nelson Rfa Silva | 48 | 332 | 3.84027778 |
| 759 | Gerry Linden | 53 | 236 | 3.83798417 |
| 760 | Chen Feng | 37 | 618 | 3.80401235 |
| 761 | James C Kulild | 37 | 618 | 3.78612245 |
| 762 | William F Vann Jr | 49 | 314 | 3.77777778 |
| 763 | Yan-Fang Ren 任延方 | 37 | 618 | 3.77282688 |
| 764 | Rafael Francisco Lia Mondelli | 40 | 519 | 3.76186998 |
| 765 | JE Martin | 58 | 165 | 3.75754423 |
| 766 | Gülfem Ergün | 32 | 868 | 3.73979592 |
| 767 | Kevin O'Brien | 57 | 178 | 3.7368595 |
| 768 | Andrea Pilloni | 34 | 755 | 3.70847751 |
| 769 | Francisco Javier Rodríguez Lozano | 34 | 755 | 3.70703125 |
| 770 | Rosemary Shinkai | 32 | 868 | 3.69140625 |
| 771 | Cláudia Helena Lovato Da Silva | 40 | 519 | 3.69125521 |
| 772 | M Ajmal | 51 | 276 | 3.65754438 |
| 773 | Rosa Helena Miranda Grande | 35 | 707 | 3.6412037 |
| 774 | Jennifer Yvette Webster | 33 | 809 | 3.63666667 |
| 775 | Giuseppe Pizzo | 32 | 868 | 3.625 |
| 776 | Guilherme Carpena Lopes | 33 | 809 | 3.60986159 |
| 777 | Renty B Franklin | 56 | 196 | 3.60768176 |
| 778 | Won-Yoon Chung | 40 | 519 | 3.57561728 |
| 779 | Frank J Verstraete | 42 | 462 | 3.57525283 |
| 780 | Liran Levin | 67 | 101 | 3.56542969 |
| 781 | Vinicius Pedrazzi | 33 | 809 | 3.56222222 |
| 782 | Flavio Uribe | 32 | 868 | 3.52444444 |
| 783 | Susana Maria Werner Samuel | 36 | 669 | 3.52148438 |
| 784 | Zohaib Akram | 38 | 583 | 3.51953125 |
| 785 | José Carlos Pereira | 50 | 293 | 3.50694444 |
| 786 | Marita Rohr Inglehart | 47 | 350 | 3.50189036 |
| 787 | Yuichi Kitasako | 35 | 707 | 3.49902344 |
| 788 | Brian O Connell | 37 | 618 | 3.484375 |
| 789 | Louisa K James | 30 | 973 | 3.4799169 |
| 790 | Mike Hubbard | 37 | 618 | 3.470625 |
| 791 | Shin Jae Lee | 36 | 669 | 3.4644898 |
| 792 | David Normando | 33 | 809 | 3.4522449 |
| 793 | Gabriele Cervino | 48 | 332 | 3.441875 |
| 794 | Mark Cross | 52 | 253 | 3.4372428 |
| 795 | Cleidiel Lemos | 37 | 618 | 3.43364198 |
| 796 | Montserrat Mercadé Bellido | 35 | 707 | 3.43346939 |
| 797 | graham ogden | 42 | 462 | 3.43186962 |
| 798 | Michele Cassetta | 32 | 868 | 3.4140625 |
| 799 | Young Guk Park | 36 | 669 | 3.40657439 |
| 800 | Janete A Anselmo Franci | 45 | 389 | 3.4053288 |
| 801 | JT Wright | 55 | 211 | 3.38868343 |
| 802 | José López-López | 51 | 276 | 3.38203018 |
| 803 | Rafiqul Islam | 56 | 196 | 3.37093048 |
| 804 | Manoela Domingues Martins | 48 | 332 | 3.36935764 |
| 805 | Halboub Esam | 32 | 868 | 3.36816406 |
| 806 | Erik Dabelsteen | 52 | 253 | 3.36528926 |
| 807 | David Maxwell | 44 | 409 | 3.36484798 |
| 808 | Stjepan Spalj | 30 | 973 | 3.36444444 |
| 809 | Raquel Assed Bezerra Da Silva | 52 | 253 | 3.35420856 |
| 810 | Marcantonio Rac | 34 | 755 | 3.34688581 |
| 811 | Karen Cherubini | 36 | 669 | 3.34122449 |
| 812 | Нигман Хабилов | 35 | 707 | 3.33818939 |
| 813 | Suzana Machado De Sousa | 40 | 519 | 3.33372992 |
| 814 | Lih Jyh Fuh | 36 | 669 | 3.31888889 |
| 815 | Gunilla Klingberg | 37 | 618 | 3.30518519 |
| 816 | L Shannon Holliday | 36 | 669 | 3.30478395 |
| 817 | Ruth Lipman | 35 | 707 | 3.29583559 |
| 818 | Ricardo Guimarães Fischer | 37 | 618 | 3.29501385 |
| 819 | Jose Antonio Poli De Figueiredo | 43 | 432 | 3.28880476 |
| 820 | Marcela Hernández R | 38 | 583 | 3.27944215 |
| 821 | Roberto Farina | 37 | 618 | 3.27700831 |
| 822 | Lesley Bergmeier | 35 | 707 | 3.27613412 |
| 823 | Luiz Renato Paranhos | 34 | 755 | 3.26515705 |
| 824 | Mark Latta | 49 | 314 | 3.2594518 |
| 825 | Francisco Wanderley Garcia Paula Silva | 33 | 809 | 3.24408163 |
| 826 | Jj De Soet | 46 | 366 | 3.23753086 |
| 827 | Manal A Awad | 35 | 707 | 3.20616319 |
| 828 | Hong Tzong Yau | 36 | 669 | 3.20524691 |
| 829 | David Manton | 58 | 165 | 3.19739645 |
| 830 | Gerald McKenna | 32 | 868 | 3.19375574 |
| 831 | Ana Lucia Machado | 55 | 211 | 3.16993464 |
| 832 | Joel M White | 40 | 519 | 3.16735537 |
| 833 | Osama Abu Hammad | 30 | 973 | 3.16210938 |
| 834 | Luigi Checchi | 36 | 669 | 3.15929705 |
| 835 | Paul Casamassimo | 41 | 488 | 3.13660975 |
| 836 | Maria Do Carmo Matias Freire | 30 | 973 | 3.1221304 |
| 837 | Giulio Gavini | 36 | 669 | 3.11496914 |
| 838 | Han Cheol Choe | 37 | 618 | 3.10734072 |
| 839 | Milton Carlos Kuga | 32 | 868 | 3.10416667 |
| 840 | Adriano Loyola | 37 | 618 | 3.10262346 |
| 841 | Tamar Brosh | 37 | 618 | 3.1025 |
| 842 | Demetrios J. Halazonetis, Δημήτρης Ι. Χαλαζωνίτης | 36 | 669 | 3.078238 |
| 843 | Guilherme Elias Pessanha Henriques | 32 | 868 | 3.06139438 |
| 844 | Eugenio Garcia | 37 | 618 | 3.05305652 |
| 845 | Volnei Garrafa | 47 | 350 | 3.05246914 |
| 846 | William R Abrams | 60 | 151 | 3.04998564 |
| 847 | Hans Peter Müller | 41 | 488 | 3.04975663 |
| 848 | Marcio Fernando De Moraes Grisi | 39 | 555 | 3.04705215 |
| 849 | Cinzia Maspero | 32 | 868 | 3.03027344 |
| 850 | Ahmad S Al Hiyasat | 30 | 973 | 3.02441406 |
| 851 | Eino Honkala | 44 | 409 | 3.01807851 |
| 852 | Michel Dard | 53 | 236 | 3.01748971 |
| 853 | Leonardo Marchini | 33 | 809 | 2.99755102 |
| 854 | Umberto Romeo | 36 | 669 | 2.99707816 |
| 855 | Decio Dos Santos Pinto Jr | 38 | 583 | 2.94875346 |
| 856 | Kostas Tsiklakis | 32 | 868 | 2.939375 |
| 857 | Sevil Çiftçi Gürgan | 37 | 618 | 2.93628809 |
| 858 | Luigi Gallo | 38 | 583 | 2.93359632 |
| 859 | Yumiko Nagao | 31 | 917 | 2.90796202 |
| 860 | Wael Att | 56 | 196 | 2.90663602 |
| 861 | Michael Botelho | 37 | 618 | 2.89473684 |
| 862 | Janicke L Jensen | 34 | 755 | 2.8884083 |
| 863 | Giuseppe Corinaldesi | 34 | 755 | 2.8866782 |
| 864 | Wilson Roberto Poi | 32 | 868 | 2.87716263 |
| 865 | Gaetane Leloup | 37 | 618 | 2.84890427 |
| 866 | Hans Zoellner | 31 | 917 | 2.84734694 |
| 867 | Sandra R. Torres | 33 | 809 | 2.84556787 |
| 868 | Takafumi Kato | 44 | 409 | 2.83844953 |
| 869 | Anura Ariyawardana | 30 | 973 | 2.83345508 |
| 870 | Jostein Grytten | 38 | 583 | 2.83102493 |
| 871 | S Aída Borges Yáñez | 35 | 707 | 2.82122449 |
| 872 | Claudio Poggio | 44 | 409 | 2.81689342 |
| 873 | Maria Da Luz Rosario De Sousa | 45 | 389 | 2.80133278 |
| 874 | Anne Maguire | 33 | 809 | 2.79766253 |
| 875 | Ayşen Yarat | 33 | 809 | 2.78472222 |
| 876 | John T Grbic | 37 | 618 | 2.77664399 |
| 877 | Nikos Kotsanos | 31 | 917 | 2.73553719 |
| 878 | Alexandre Luiz Souto Borges | 33 | 809 | 2.73372781 |
| 879 | Nelly Molina Frechero | 33 | 809 | 2.70890725 |
| 880 | Arjen Van Wijk | 40 | 519 | 2.70375 |
| 882 | Tanaka Om | 33 | 809 | 2.68005844 |
| 883 | Rebecca Harris | 34 | 755 | 2.67180342 |
| 884 | Tayfun Akoz | 32 | 868 | 2.6712963 |
| 885 | Tetsu Takahashi | 57 | 178 | 2.6689149 |
| 886 | Fusun Ozer | 32 | 868 | 2.65142857 |
| 887 | Eduardo Colombari | 37 | 618 | 2.65135803 |
| 888 | Tania Mary Cestari | 31 | 917 | 2.64941406 |
| 889 | Raphael Pilo | 37 | 618 | 2.64845863 |
| 890 | Luis Roberto Marcondes Martins | 41 | 488 | 2.62665406 |
| 891 | Lelia Batista De Souza | 37 | 618 | 2.62345041 |
| 892 | Özkan Miloğlu | 32 | 868 | 2.5683391 |
| 893 | Åke Tegelberg | 31 | 917 | 2.5449233 |
| 894 | Pelin Güneri | 33 | 809 | 2.52739226 |
| 895 | Neil Hunter | 42 | 462 | 2.52513646 |
| 896 | Peter James Thomson | 43 | 432 | 2.50865052 |
| 897 | Luciane Rezende Costa | 33 | 809 | 2.50694444 |
| 898 | Cristiane Baccin Bendo | 30 | 973 | 2.48302469 |
| 899 | Eduardo Nunes | 30 | 973 | 2.47368421 |
| 900 | Giulio Alessandri Bonetti | 34 | 755 | 2.44049967 |
| 901 | Susan Friedman | 33 | 809 | 2.4272 |
| 902 | Cristiane Yumi Koga Ito | 41 | 488 | 2.42315702 |
| 903 | Idelmo Rangel Garcia Junior | 37 | 618 | 2.42130882 |
| 904 | Fernanda Garcia | 31 | 917 | 2.38811728 |
| 905 | Vivek Aggarwal | 31 | 917 | 2.38365651 |
| 906 | Ricardo Faria Ribeiro | 40 | 519 | 2.37996219 |
| 907 | Vicente A Torres | 31 | 917 | 2.379375 |
| 908 | José Flávio Affonso Almeida | 40 | 519 | 2.35281065 |
| 909 | Marco Colombo | 38 | 583 | 2.34349031 |
| 910 | Roberta Tarkany Basting | 40 | 519 | 2.34060651 |
| 911 | Sakellari Dimitra | 31 | 917 | 2.32175926 |
| 912 | Ahed Al Wahadni | 31 | 917 | 2.3082542 |
| 913 | Elismauro Francisco Mendonca | 32 | 868 | 2.296875 |
| 914 | Yun Sook Kim | 33 | 809 | 2.29235537 |
| 915 | Faleh Sawair | 32 | 868 | 2.29155125 |
| 916 | Jefferson Pereira | 35 | 707 | 2.28994083 |
| 917 | Simonides Consani | 47 | 350 | 2.24553571 |
| 918 | Che Husna Azhari | 33 | 809 | 2.23800132 |
| 919 | Ayman Ahmed | 39 | 555 | 2.23593964 |
| 920 | Rafael Leonardo Xediek Consani | 37 | 618 | 2.23140496 |
| 921 | Farzaneh Ahrari | 35 | 707 | 2.21893491 |
| 922 | Alvaro Borges | 30 | 973 | 2.21814404 |
| 923 | Willie Van Heerden | 30 | 973 | 2.20679012 |
| 924 | Gao Xiaoli | 30 | 973 | 2.20637119 |
| 925 | Farzaneh Agha-Hosseini | 31 | 917 | 2.19576333 |
| 926 | Ourania Nicolatou Galitis | 31 | 917 | 2.18383743 |
| 927 | Lindsay Richards | 42 | 462 | 2.1724 |
| 928 | Valdir Gouveia Garcia | 41 | 488 | 2.16451479 |
| 929 | Keiichiro Nishida | 44 | 409 | 2.15758695 |
| 930 | Arnaldo Pinzan | 35 | 707 | 2.14074074 |
| 931 | Stefan Ruhl | 32 | 868 | 2.12563915 |
| 932 | Philip Benson | 40 | 519 | 2.11362608 |
| 933 | Larry Bellinger Regents | 38 | 583 | 2.11226451 |
| 934 | Luiz Antonio Salata | 31 | 917 | 2.07231556 |
| 935 | Maria Fidela Navarro | 43 | 432 | 2.07015306 |
| 936 | Renata Pascotto | 31 | 917 | 2.06574142 |
| 937 | Matheus Melo Pithon | 41 | 488 | 2.01950413 |
| 938 | Alan Roger Santos Silva | 42 | 462 | 2.01388889 |
| 939 | Anamika Sharma | 44 | 409 | 2.00897959 |
| 940 | Igor Yu. Lebedenko Игорь Юльевич Лебеденко | 30 | 973 | 2.00730488 |
| 941 | Pauline Ford | 37 | 618 | 2.00147929 |
| 942 | Yuji Sato | 37 | 618 | 1.99231065 |
| 943 | José Roberto Rodrigues | 36 | 669 | 1.96347559 |
| 944 | Cláudio Antonio Talge Carvalho | 33 | 809 | 1.95657347 |
| 945 | Marcelo Gp Cavalcanti | 40 | 519 | 1.95626822 |
| 946 | Kazuyuki Ishihara | 58 | 165 | 1.95580716 |
| 947 | Jonas Rodrigues | 33 | 809 | 1.92861006 |
| 948 | Flávio Alves | 32 | 868 | 1.91295294 |
| 949 | Joao Paulo Mendes Tribst | 31 | 917 | 1.91269841 |
| 950 | Eloi Dezan Junior | 35 | 707 | 1.88921283 |
| 951 | Maureen Stone | 46 | 366 | 1.87704712 |
| 952 | Luca Lombardo | 39 | 555 | 1.86909091 |
| 953 | Giselle Maria Marchi | 33 | 809 | 1.86238117 |
| 954 | Yehya Mostafa | 31 | 917 | 1.85667929 |
| 955 | Juan Pablo Loyola-Rodriguez | 39 | 555 | 1.85069444 |
| 956 | Patricia Smith | 43 | 432 | 1.79667063 |
| 957 | Esa Klemetti | 30 | 973 | 1.77316417 |
| 958 | Roger Zwahlen | 45 | 389 | 1.75669422 |
| 959 | Rita Cordeiro | 34 | 755 | 1.75 |
| 960 | Deborah Queiroz Freitas | 37 | 618 | 1.73164168 |
| 961 | Efigênia Ferreira E Ferreira | 45 | 389 | 1.68944637 |
| 962 | Sônia Regina Panzarini | 32 | 868 | 1.68352171 |
| 963 | Ramon Eduardo Fuentes Fernandez | 33 | 809 | 1.68346522 |
| 964 | Marcus Vinicius Reis Só | 37 | 618 | 1.64821223 |
| 965 | Goran Pichler | 31 | 917 | 1.64201183 |
| 966 | Yorimasa Ogata | 39 | 555 | 1.63807398 |
| 967 | André Luis Faria E Silva | 36 | 669 | 1.61514802 |
| 968 | Joao Batista Cesar Neto | 33 | 809 | 1.59978367 |
| 969 | Alexandra Sklavounou | 31 | 917 | 1.59653867 |
| 970 | Takashi Ono | 42 | 462 | 1.59510204 |
| 971 | John W. Nicholson | 53 | 236 | 1.55624662 |
| 972 | Claudia Magalhães | 31 | 917 | 1.554375 |
| 973 | Raquel Conceição Ferreira | 35 | 707 | 1.53221787 |
| 974 | Peter Gaengler | 32 | 868 | 1.52323792 |
| 975 | Frank Catalanotto | 38 | 583 | 1.51849112 |
| 976 | Silva RF | 33 | 809 | 1.51603306 |
| 977 | Rodrigo Othavio Assuncao Souza | 32 | 868 | 1.50390625 |
| 978 | Ríos-Santos, JV | 37 | 618 | 1.47002551 |
| 979 | Kazuyoshi Baba | 51 | 276 | 1.40805396 |
| 980 | Antonio Carlos Pereira | 52 | 253 | 1.40359654 |
| 981 | Taku Fujiwara | 42 | 462 | 1.38548753 |
| 982 | Gary R Goldstein | 33 | 809 | 1.38056248 |
| 983 | Idomeo Bonetti Filho | 30 | 973 | 1.369375 |
| 984 | Lucio Souza Gonçalves | 31 | 917 | 1.32819659 |
| 985 | Ronald G Craig | 35 | 707 | 1.32713499 |
| 986 | Koji Kamagata | 40 | 519 | 1.32 |
| 987 | Suarez Garcia Maria Jesus | 32 | 868 | 1.1492767 |
| 988 | Il Sung Jang | 30 | 973 | 1.14340638 |
| 989 | José Mondelli | 33 | 809 | 1.14120095 |
| 990 | Vivien Sakai | 37 | 618 | 1.14111111 |
| 991 | Michael W Roberts | 34 | 755 | 1.12851197 |
| 992 | Efthymia Kitraki | 30 | 973 | 1.10841984 |
| 993 | Mehrdad Lotfi | 38 | 583 | 1.09738581 |
| 994 | David Johnsen | 30 | 973 | 1.08919646 |
| 995 | Donald A Curtis | 37 | 618 | 1.08833333 |
| 996 | David A Nash | 30 | 973 | 1.07727797 |
| 997 | Clemencia M Vargas | 30 | 973 | 1.0625 |
| 998 | Chukwudi Onyeaso | 30 | 973 | 1.02191465 |
| 999 | Eduardo Passos Rocha | 34 | 755 | 1.00045914 |
| 1000 | Alma Rosa Rojas Garcia | 34 | 755 | 0.9693287 |
| 1001 | Lucas Garcia | 34 | 755 | 0.96522993 |
| 1002 | Tomohiro Yamada | 33 | 809 | 0.94147987 |
| 1003 | Shinichi Abe | 34 | 755 | 0.92534722 |
| 1004 | Javier Enrique Botero Torres | 30 | 973 | 0.9217128 |
| 1005 | Paul Anderson | 36 | 669 | 0.87841797 |
| 1006 | Eric Everett | 35 | 707 | 0.86958154 |
| 1007 | Manoel Santana Filho | 33 | 809 | 0.85058594 |
| 1008 | Jorge Esquiche León | 31 | 917 | 0.84310019 |
| 1009 | Dhoom SIngh Mehta | 35 | 707 | 0.83774539 |
| 1010 | WP Holbrook | 41 | 488 | 0.79421433 |
| 1011 | Wei Shao Lin | 30 | 973 | 0.73797366 |
| 1012 | Qian Wang | 30 | 973 | 0.71474913 |
| 1013 | Éricka Janine Dantas Da Silveira | 30 | 973 | 0.70588235 |
| 1014 | Allyson Nogueira Moreira | 32 | 868 | 0.70361578 |
| 1015 | Marcelo Suzuki | 42 | 462 | 0.69799227 |
| 1016 | Alessandro Antonio Costa Pereira | 34 | 755 | 0.67471591 |
| 1017 | Carlos Rocha Gomes Torres | 43 | 432 | 0.67310774 |
| 1018 | Yasumasa KATO | 33 | 809 | 0.64812612 |
| 1019 | Aline Evangelista De Souza Gabriel | 30 | 973 | 0.60640138 |
| 1020 | Evanthia Lalla | 52 | 253 | 0.21863566 |
